# Supplementary material for: An Examination of the Personality Structural Foundations of Facets of Emotional Intelligence
Source: Research Square preprint supplement (doi:10.21203/rs.3.rs-8277771/v1), 2025-12-17
Supplement: Supplementary file 1 [file 6f63f9622a06aa22a2ee306a.xlsx]

## Sheet: Sheet1
	Article: An Examination of the Personality Structural Foundations of Facets of Emotional Intelligence
	Journal: Discover Psychology
	Supplement 1: Inter-correlation matrix between EIP3 scales and the TDA-100 scales
		Scale	Mean	SD	1	2	3	4	5	6	7	8	9	10	11	12	13	14	15	16	17	18	19	20	21	22	23	24	25	26	27	28	29	30	31
	1	Self Regard	3.1596	0.84367	0.87
	2	Regard for Others	3.321	0.64708	0.14	0.8
	3	Self Awareness	3.5395	0.53084	0.262	0.259	0.74
	4	Awareness of Others	3.538	0.6009	0.129048	0.649	0.577	0.76
	5	Emotional Resilience	3.3927	0.72596	0.706	0.139	0.262	0.162	0.85
	6	Personal Power	3.282	0.66965	0.684	0.0834399	0.363	0.197	0.631	0.8
	7	Goal Directedness	3.5974	0.59548	0.522	0.0863555	0.524	0.297	0.52	0.618	0.81
	8	Flexibility	3.0371	0.63974	0.543	0.254	0.339	0.295	0.588	0.525	0.514	0.78
	9	Connecting with Others	3.141	0.76578	0.327	0.405	0.378	0.52	0.294	0.323	0.405	0.396	0.84
	10	Authenticity	3.631	0.60007	0.624	0.142	0.356	0.139	0.499	0.485	0.444	0.389	0.0998777	0.78
	11	Mistrusting	3.3541	0.76042	-0.358	-0.522	-0.144	-0.282	-0.248	-0.216	-0.0669005	-0.309	-0.361	-0.246	0.82
	12	Carefully Trusting	3.4035	0.73897	0.265	0.585	0.145	0.394	0.259	0.244	0.192	0.293	0.493	0.0837851	-0.626	0.85
	13	Over Trusting	2.9632	0.6751	-0.0836126	0.444	-0.0383891	0.28	0.0167278	-0.0701431	-0.00997237	0.0894635	0.407	-0.341	-0.289	0.654	0.75
	14	Pessimistic	2.929	0.76771	-0.667	-0.295	-0.276	-0.189	-0.561	-0.598	-0.367	-0.517	-0.222	-0.529	0.501	-0.318	0.0352044	0.75
	15	Realistically Optimistic	3.7532	0.5935	0.459	0.311	0.401	0.392	0.609	0.506	0.53	0.446	0.417	0.299	-0.185	0.428	0.191	-0.514	0.82
	16	Over Optimistic	2.824	0.60436	-0.358	0.0230846	-0.232	-0.0818214	-0.227	-0.31	-0.256	-0.157	0.153	-0.599	0.0514089	0.216	0.536	0.296	0.0125099	0.69
	17	Emotionally Under Controlled	2.7377	0.82689	-0.606	-0.248	-0.217	-0.169	-0.648	-0.461	-0.33	-0.508	-0.0659032	-0.59	0.363	-0.126014	0.207	0.621	-0.409	0.428	0.8
	18	Free and in Charge	3.3913	0.61028	0.459	0.226	0.476	0.447	0.573	0.429	0.561	0.49	0.592	0.224	-0.119658	0.327	0.249	-0.283	0.542	-0.019868	-0.346	0.73
	19	Emotionally Over Controlled	3.142	0.81865	-0.512	-0.238	-0.535	-0.392	-0.368	-0.463	-0.377	-0.408	-0.483	-0.394	0.375	-0.239	-0.0193505	0.426	-0.265	0.263	0.33	-0.38	0.83
	20	Passive	3.1195	0.71937	-0.497	0.22	-0.251	0.0874372	-0.356	-0.401	-0.357	-0.3	-0.0771683	-0.581	0.0949535	0.159	0.507	0.345	-0.136	0.53	0.345	-0.149	0.348	0.74
	21	Assertive	3.6537	0.5359	0.415	0.16	0.459	0.366	0.515	0.509	0.652	0.438	0.469	0.391	-0.113425	0.314	0.0928105	-0.302	0.573	-0.173	-0.307	0.583	-0.332	-0.311	0.72
	22	Aggressive	2.6346	0.83688	-0.0280935	-0.567	-0.0867717	-0.347	0.0302706	0.0857924	0.165	-0.0188847	-0.0386669	-0.109068	0.401	-0.203	-0.136	0.317	-0.0751592	0.109533	0.354	0.0182965	0.132	-0.265	0.171	0.82
	23	Dependent	2.7169	0.79237	-0.581	0.0251216	-0.259	-0.0285534	-0.471	-0.461	-0.331	-0.397	0.0204221	-0.706	0.0750386	0.111578	0.446	0.471	-0.237	0.522	0.543	-0.159	0.276	0.608	-0.263	0.000163492	0.78
	24	Interdependent	3.4957	0.51474	0.311	0.325	0.394	0.351	0.437	0.429	0.503	0.409	0.529	0.241	-0.222	0.438	0.236	-0.305	0.56	0.0406329	-0.215	0.526	-0.294	-0.12306	0.653	0.0874864	-0.110684	0.66
	25	Over Independent	3.355	0.61606	-0.272	-0.397	-0.169	-0.265	-0.123619	-0.106098	-0.040438	-0.261	-0.446	-0.139	0.551	-0.358	-0.202	0.331	-0.0971074	0.0354508	0.0931307	-0.115759	0.391	0.117361	-0.106957	0.219	-0.0671969	-0.161	0.66
	26	Reflective Learning	3.2981	0.56989	-0.00781328	0.357	0.425	0.503	0.0890106	0.213	0.385	0.228	0.456	0.0426927	-0.0835342	0.339	0.264	-0.0351793	0.368	0.0685658	0.0116604	0.465	-0.178	0.0403163	0.431	0.0178514	0.107373	0.473	-0.117292	0.75
	27	Extraversion	0	1	-0.265	0.00931093	-0.31	-0.169	-0.23	-0.337	-0.319	-0.309	-0.588	-0.138	0.158	-0.103514	0.0155405	0.165	-0.169	0.0375586	-0.0736683	-0.294	0.447	0.31	-0.272	-0.259	0.18	-0.319	0.329	-0.185	—
	28	Agreeableness	0	1	-0.0335811	-0.674	-0.214	-0.573	-0.0165886	0.0322163	-0.0259317	-0.0693461	-0.41	-0.0353916	0.356	-0.416	-0.422	0.157	-0.234	-0.0784989	0.0718818	-0.18	0.167	-0.248	-0.0473464	0.589	-0.115141	-0.0711416	0.331	-0.217	0	—
	29	Conscientiousness	0	1	-0.232	-0.0123388	-0.286	-0.123345	-0.185	-0.341	-0.437	-0.141	0.0486569	-0.44	-0.0906281	0.103805	0.323	0.232	-0.267	0.424	0.241	-0.104376	0.0754805	0.342	-0.277	0.000487023	0.407	-0.215	-0.216	-0.173	0	0	—
	30	Emotional Stability	0	1	-0.704	-0.138	-0.0597002	-0.0388734	-0.707	-0.403	-0.262	-0.51	-0.12416	-0.518	0.334	-0.192	0.060825	0.573	-0.338	0.291	0.739	-0.381	0.32	0.338	-0.294	0.141	0.536	-0.17	0.103286	0.11455	0	0	0	—
	31	Openness	0	1	0.0760841	0.0622667	0.199	0.217	0.219	0.222	0.292	0.312	0.226	0.0199626	0.0437673	0.201	0.2	-0.0603632	0.36	0.185	-0.00843925	0.3	-0.019801	-0.0441614	0.384	0.234	-0.0122923	0.32	-0.0398546	0.294	0	0	0	0	—
		Notes: Mean scores for EIP3 scales are presented as average item ratings. SD = Standard deviation. Cronbach's alpha coefficients are presented in italics on the diagonal. Big Five factor scores are orthogonal regression-based scores which are standardized (mean=0, SD=1) and are uncorrelated with each other. * Correlation is significant at the p<0.05 level. ** Correlation is significant at the p< …
